# Supplementary material
Source: ML conference proceedings conference paper supplement (https://proceedings.mlr.press/v32/wangh14.html)
Supplement: Supplementary file 1 [file wangh14-supp.zip]

# Nonlinear Information-theoretic Compressive Measurement Design: Supplementary Material

Liming Wang<sup>1</sup>, Abolfazl Razi<sup>1</sup>, Miguel Dias Rodrigues<sup>2</sup>, Robert Calderbank<sup>1</sup> and  
Lawrence Carin<sup>1</sup>

<sup>1</sup>Department of Electrical & Computer Engineering, Duke University, Durham, NC  
27708, USA

<sup>2</sup>Department of Electronic and Electrical Engineering, University College London,  
London, UK

## 1 Proof of Theorem 1

*Proof of Theorem 1.* The gradient of mutual information  $\nabla_A I(X; Y)$  can be expressed as

$$\nabla_A I(X; Y) = \nabla_A [h(Y) - h(Y|X)] \quad (1)$$

$$= \nabla_A h(Y) \quad (2)$$

The equality follows from the fact that  $h(Y|X) = \mathbb{E}_X(h(\mathcal{N}(Y; A\psi(X), \Sigma)))$ , which is a constant with respect to  $A$ . Hence, we have

$$\nabla_A I(X; Y) = \nabla_A h(Y) \quad (3)$$

$$= -\nabla_A \int \log P_Y(y) P_Y(y) dy \quad (4)$$

$$= -\int \nabla_A P_Y(y) dy - \int \log P_Y(y) \nabla_A P_Y(y) dy \quad (5)$$

$$= -\nabla_A \int P_Y(y) dy - \int \log P_Y(y) \nabla_A P_Y(y) dy \quad (6)$$

$$= -\int \log P_Y(y) \nabla_A P_Y(y) dy, \quad (7)$$

where the change of operator orders in (5) and (6) follows from the assumed regularity conditions. We now calculate the term  $\nabla_A P_Y(y)$

$$\nabla_A P_Y(y) = \nabla_A \int P_{Y|X}(y|x) P_X(x) dx \quad (8)$$

$$= \int P_X(x) \nabla_A P_{Y|X}(y|x) dx \quad (9)$$

$$= \int P_X(x) \nabla_A \mathcal{N}(y; A\psi(x), \Sigma) dx \quad (10)$$

$$= \int P_X(x) \nabla_y \mathcal{N}(y; A\psi(x), \Sigma) \psi^T(x) dx \quad (11)$$

$$= \int P_X(x) \nabla_y P_{Y|X}(y|x) \psi^T(x) dx, \quad (12)$$

where (11) follows from the chain rule. Plug in (12) back to (7) and by the Fubini's Theorem [1], together with the regularity conditions, we have

$$\nabla_A I(X; Y) = - \int \log P_Y(y) P_X(x) \nabla_y P_{Y|X}(y|x) \psi^T(x) dx dy \quad (13)$$

$$= - \int \nabla_y (\log P_Y(y)) P_X(x) P_{Y|X}(y|x) \psi^T(x) dx dy \quad (14)$$

$$= - \int \frac{P_X(x) P_{Y|X}(y|x)}{P_Y(y)} \nabla_y P_Y(y) \psi^T(x) dx dy \quad (15)$$

$$= - \int \nabla_y P_Y(y) \mathbb{E}[\psi^T(X)|Y=y] dy, \quad (16)$$

where (14) invokes the integration by parts [1]. Again via the assumed regularity conditions,  $\nabla_y P_Y(y)$  can be expressed as

$$\nabla_y P_Y(y) = \int \nabla_y P_{Y|X}(y|x) P_X(x) dx \quad (17)$$

$$= \int \nabla_y \log P_{Y|X}(y|x) P_{Y|X}(y|x) P_X(x) dx \quad (18)$$

$$= \int \nabla_y \log \mathcal{N}(y; A\psi(x), \Sigma) P_{X|Y=y}(x|y) P_Y(y) dx \quad (19)$$

$$= \mathbb{E}[(\nabla_Y \log \mathcal{N}(Y; A\psi(X), \Sigma)) | Y=y] P_Y(y). \quad (20)$$

It is straightforward to calculate

$$\nabla_y \log \mathcal{N}(y; A\psi(x), \Sigma) = -\Sigma^{-1}(y - A\psi(x)). \quad (21)$$

Hence, we have

$$\nabla_y P_Y(y) = \mathbb{E}[-\Sigma^{-1}(Y - A\psi(X))] P_Y(y) \quad (22)$$

$$= -\Sigma^{-1} \mathbb{E}[W|Y=y] P_Y(y). \quad (23)$$

Combining (23) with (16), we obtain

$$\nabla_A I(X; Y) = \int \Sigma^{-1} \mathbb{E}[W|Y=y] P_Y(y) \mathbb{E}[\psi^T(X)|Y=y] dy \quad (24)$$

$$= \Sigma^{-1} \mathbb{E}[\mathbb{E}[W|Y] \mathbb{E}[\psi^T(X)|Y]] \quad (25)$$

$$= \Sigma^{-1} \mathbb{E}[\mathbb{E}[Y - A\psi(X)|Y] \mathbb{E}[\psi^T(X)|Y]] \quad (26)$$

$$= \Sigma^{-1} \mathbb{E}[\mathbb{E}[Y\psi^T(X)|Y]] - A \mathbb{E}[\mathbb{E}[\psi(X)|Y] \mathbb{E}[\psi^T(X)|Y]] \quad (27)$$

$$= \Sigma^{-1} \mathbb{E}[\mathbb{E}[(A\psi(X) + W)\psi^T(X)]] - A \mathbb{E}[\mathbb{E}[\psi(X)|Y] \mathbb{E}[\psi^T(X)|Y]] \quad (28)$$

$$= \Sigma^{-1} \mathbb{E}[\mathbb{E}[A\psi(X)\psi^T(X)]] - A \mathbb{E}[\mathbb{E}[\psi(X)|Y] \mathbb{E}[\psi^T(X)|Y]] \quad (29)$$

$$= \Sigma^{-1} A \mathbb{E}[\mathbb{E}[\psi(X)\psi^T(X)]] - \mathbb{E}[\mathbb{E}[\psi(X)|Y] \mathbb{E}[\psi^T(X)|Y]] \quad (30)$$

$$= \Sigma^{-1} A \mathbb{E}[\mathbb{E}[\psi(X)\psi^T(X)]] - \mathbb{E}[\psi(X) \mathbb{E}[\psi^T(X)|Y]] \quad (31)$$

$$- \mathbb{E}[\psi(X)|Y] \mathbb{E}[\psi^T(X)] + \mathbb{E}[\psi(X)|Y] \mathbb{E}[\psi^T(X)|Y] \quad (31)$$

$$= \Sigma^{-1} A \mathbb{E}[(\psi(X) - \mathbb{E}[\psi(X)|Y]) (\psi(X) - \mathbb{E}[\psi(X)|Y])^T]. \quad (32)$$

Note that we do not assume specific form of  $\psi(x)$  in previous proof, thus it applies to arbitrary basis vector  $\psi(x)$ , provided that it satisfies the regularity conditions.  $\square$

## 2 Proof of Theorem 2

*Proof of Theorem 2.* First we notice that

$$I(C; Y) = h(Y) - h(Y|C) \quad (33)$$

$$= h(Y) - h(Y|X) + h(Y|X, C) - h(Y|C) \quad (34)$$

$$= I(X; Y) - I(X; Y|C), \quad (35)$$

where the second equality is due to the fact that  $C \rightarrow X \rightarrow Y$  forms a Markov chain and  $P_{Y|X,C} = P_{Y|X}$ . Following by the similar steps in the proof of Theorem 1, we have

$$\nabla_A I(X; Y|C) = \Sigma^{-1} A \mathbb{E}[(\psi(X) - \mathbb{E}[\psi(X)|Y, C]) (\psi(X) - \mathbb{E}[\psi(X)|Y, C])^T]. \quad (36)$$

Using the following facts that

$$\mathbb{E}[\mathbb{E}[\psi(X)|Y, C] \mathbb{E}[\psi(X)^T|Y, C]] = \mathbb{E}[\mathbb{E}[\psi(X)|Y, C] \psi(X)^T] = \mathbb{E}[\psi(X) \mathbb{E}[\psi(X)^T|Y, C]] \quad (37)$$

$$\mathbb{E}[\mathbb{E}[\psi(X)|Y, C] \mathbb{E}[\psi(X)^T|Y]] = \mathbb{E}[\mathbb{E}[\psi(X)|Y] \mathbb{E}[\psi(X)^T|Y, C]] = \mathbb{E}[\mathbb{E}[\psi(X)|Y] \mathbb{E}[\psi(X)^T|Y]] \quad (38)$$

$$\mathbb{E}[\psi(X) \mathbb{E}[\psi(X)^T|Y]] = \mathbb{E}[\mathbb{E}[\psi(X)|Y] \psi(X)^T] = \mathbb{E}[\mathbb{E}[\psi(X)|Y] \mathbb{E}[\psi(X)^T|Y]], \quad (39)$$

we have the following expressions

$$\begin{aligned} & \mathbb{E}[(\psi(X) - \mathbb{E}[\psi(X)|Y]) (\psi(X) - \mathbb{E}[\psi(X)|Y])^T] \\ &= \mathbb{E}[\psi(X) \psi(X)^T - \psi(X) \mathbb{E}[\psi(X)^T|Y] - \mathbb{E}[\psi(X)|Y] \psi(X)^T + \mathbb{E}[\psi(X)|Y] \mathbb{E}[\psi(X)^T|Y]] \quad (40) \end{aligned}$$

$$\begin{aligned} &= \mathbb{E}[\psi(X) \psi(X)^T - \psi(X) \mathbb{E}[\psi(X)^T|Y, C] - \mathbb{E}[\psi(X)|Y, C] \psi(X)^T + \mathbb{E}[\psi(X)|Y, C] \mathbb{E}[\psi(X)^T|Y, C] \\ &+ \mathbb{E}[\psi(X)|Y, C] \mathbb{E}[\psi(X)^T|Y, C] - \mathbb{E}[\psi(X)|Y, C] \mathbb{E}[\psi(X)^T|Y] - \mathbb{E}[\psi(X)|Y] \mathbb{E}[\psi(X)^T|Y, C] \\ &+ \mathbb{E}[\psi(X)|Y] \mathbb{E}[\psi(X)^T|Y]] \quad (41) \end{aligned}$$

$$= \mathbb{E}[(\psi(X) - \mathbb{E}[\psi(X)|Y, C]) (\psi(X) - \mathbb{E}[\psi(X)|Y, C])^T] \quad (42)$$

$$+ \mathbb{E}[(\mathbb{E}[\psi(X)|Y] - \mathbb{E}[\psi(X)|Y, C]) (\mathbb{E}[\psi(X)|Y] - \mathbb{E}[\psi(X)|Y, C])^T].$$

Therefore, we have

$$\nabla_A I(C; Y) = \nabla_A I(X; Y) - \nabla_A I(X; Y|C) \quad (43)$$

$$\begin{aligned} &= \mathbb{E}[(\psi(X) - \mathbb{E}[\psi(X)|Y]) (\psi(X) - \mathbb{E}[\psi(X)|Y])^T] \\ &- \mathbb{E}[(\psi(X) - \mathbb{E}[\psi(X)|Y, C]) (\psi(X) - \mathbb{E}[\psi(X)|Y, C])^T] \quad (44) \end{aligned}$$

$$= \mathbb{E}[(\mathbb{E}[\psi(X)|Y] - \mathbb{E}[\psi(X)|Y, C]) (\mathbb{E}[\psi(X)|Y] - \mathbb{E}[\psi(X)|Y, C])^T]. \quad (45)$$

□

## References

- [1] G.B. Folland. *Real Analysis: Modern Techniques and Their Applications*. Wiley New York, 1999.
